# Supplementary material for: RASSF1A is required for the maintenance of nuclear actin levels
Source: PubMed Central journal article supplement (PMC6694222; doi:10.15252/embj.2018101168), 2019-06-07

**Figure 4A**

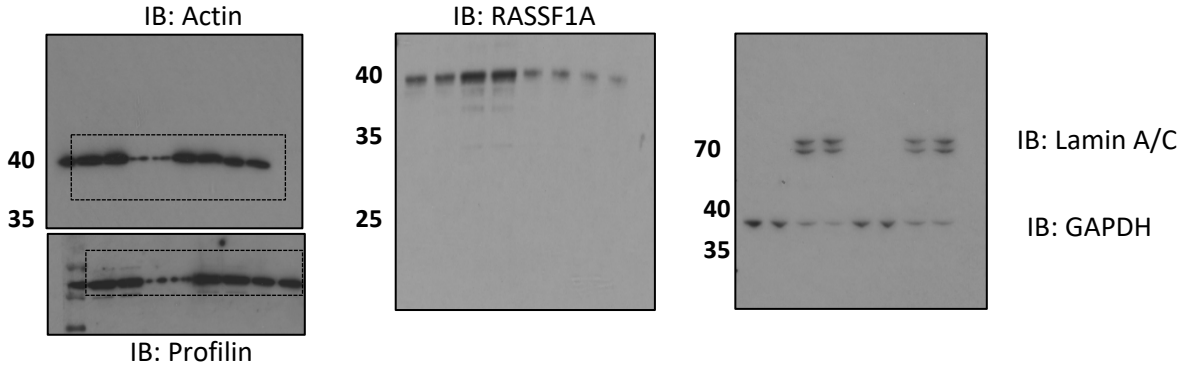

**Figure 4D**

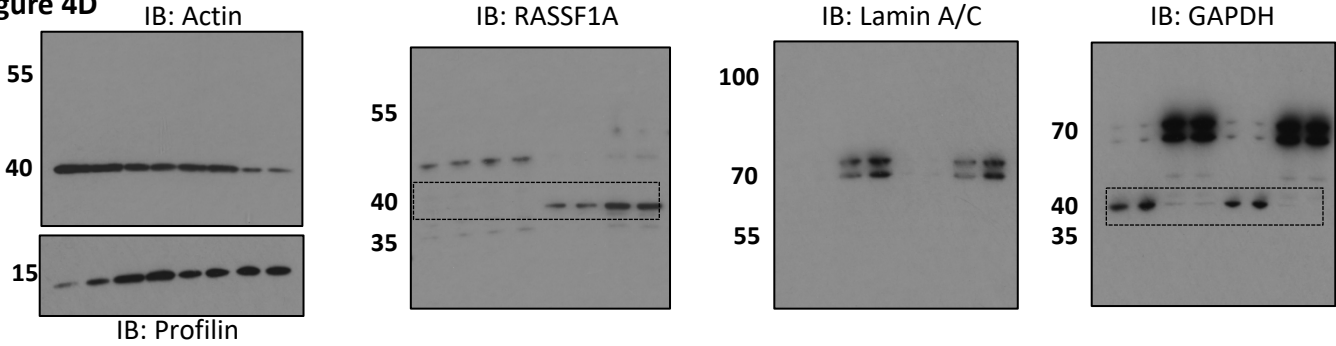

Supplement: EMBJ-38-e101168-s004.pdf [file EMBJ-38-e101168-s004.pdf]
